# Supplementary material for: The Anti-Aging Hormone Klotho Promotes Retinal Pigment Epithelium Cell Viability and Metabolism by Activating the AMPK/PGC-1α Pathway
Source: MDPI journal article supplement (doi:10.3390/antiox12020385), 2023-02-05
Supplement: s1 [file s1]

## Supplementary Data

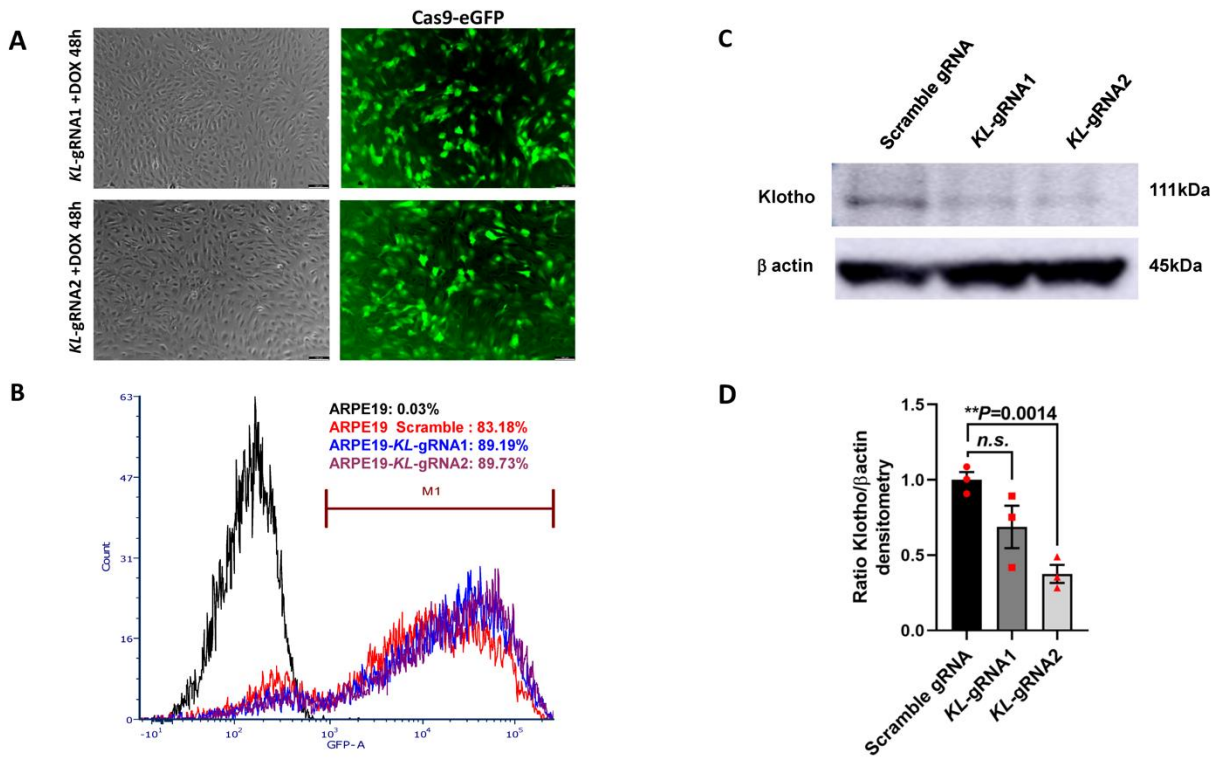

**Figure S1. Identification of ARPE19 CRISPR/Cas9 *KL* KO cells and verification of the efficiency of *KL* inhibition with different sgRNAs**

(A) ARPE19-*KL* KO cells were incubated with 2μM Doxycycline (DOX) for 48h to test the eGFP, which confirms the expression of Cas9. (B) ARPE19 cells were transfected with CRISPR/Cas9-*KL* sgRNAs vectors and selected by 2μg/ml puromycin for 2 weeks, followed by incubation with 2μM Doxycycline for 48h to induce the Cas9-eGFP expression. Flow cytometry was performed to analyze the ratio of Cas9-eGFP cells. (C,D) *KL* protein levels in Scramble control group and 2 different sgRNA groups were analyzed by Western Blots. Compared with control, *KL* protein was inhibited ~ 31% by sgRNA1 and 66% by sgRNA2. The relative densities of the bands were determined

using ImageJ software. The Unpaired *t*-test was performed using GraphPad Prism

8.3.0. Graph represents mean $\pm$ SEM, n=3, \*\**P*≤0.01.

**Table S1. Primers used for qPCR analyses.**

| Primers                  | Primer Sequence (5'-3') |
|--------------------------|-------------------------|
| human <i>PGC-1a</i> FOR  | TCTGAGTCTGTATGGAGTGACAT |
| human <i>PGC-1a</i> REV  | CCAAGTCGTTACATCTAGTTCA  |
| human <i>DRP1</i> FOR    | TTTGACACTTGTGGATTGCCA   |
| human <i>DRP1</i> REV    | AGTGACAGCGAGGATAATGGA   |
| human <i>ACADM</i> FOR   | ACAGGGGTTTCAGACTGCTATT  |
| human <i>ACADM</i> REV   | TCCTCCGTTGGTTATCCACAT   |
| human <i>NDUFS2</i> FOR  | GCTGTTATGTACCCAAGCAAAGA |
| human <i>NDUFS2</i> REV  | TCCCCACTCAATTCCATCACT   |
| human <i>NDUFS8</i> FOR  | CCATCAACTACCCGTTTCGAGA  |
| human <i>NDUFS8</i> REV  | CCGCAGTAGATGCACTTGG     |
| human <i>NDUFA8</i> FOR  | CCCAACAAGGAGTTTATGCTCT  |
| human <i>NDUFA8</i> REV  | CACAGTGACGTTTTATCTGCCT  |
| human <i>NDUFB10</i> FOR | AGCCCAATCCCATCGTCTACA   |
| human <i>NDUFB10</i> REV | GCTGCCGCTCTATAAATTCTCT  |
| human <i>OPA1</i> FOR    | TGTGAGGTCTGCCAGTCTTTA   |
| human <i>OPA1</i> REV    | TGTCCTTAATTGGGGTCGTTG   |
| human <i>ND1</i> FOR     | CCTAGCCGTTTACTCAATCCT   |
| human <i>ND1</i> REV     | TGATGGCTAGGGTGACTTCAT   |
| human <i>ACTB</i> FOR    | CATCTCTTGCTCGAAGTCCA    |
| human <i>ACTB</i> REV    | ATCATGTTTGAGACCTTCAACA  |

|                          |                         |
|--------------------------|-------------------------|
| human <i>GAPDH</i> FOR   | GGAGCGAGATCCCTCCAAAAT   |
| human <i>GAPDH</i> REV   | GGCTGTTGTCATACTTCTCATGG |
| Mouse <i>Pgc1a</i> FOR   | AGCCGTGACCACTGACAACGAG  |
| Mouse <i>Pgc1a</i> REV   | GCTGCATGGTTCTGAGTGCTAAA |
| Mouse <i>Gapdh</i> FOR   | AGACAGCCGCATCTTCTTGT    |
| Mouse <i>Gapdh</i> REV   | AATCTCCACTTTGCCACTGC    |
| Mouse <i>Acadm</i> FOR   | AACACAACACTCGAAAGCGG    |
| Mouse <i>Acadm</i> REV   | TTCTGCTGTTCCGTCAACTCA   |
| Mouse <i>Drp1</i> FOR    | CAAGGTTTTCTCGCCCAACG    |
| Mouse <i>Drp1</i> REV    | CTGCCCTTACCATCTGGATCTA  |
| Mouse <i>Ndufs2</i> FOR  | CAGCCAGATATTGAATGGGCA   |
| Mouse <i>Ndufs2</i> REV  | TGTTGGTCACCGCTTTTTCT    |
| Mouse <i>Ndufs8</i> FOR  | AGTGGCGGCAACGTACAAG     |
| Mouse <i>Ndufs8</i> REV  | TCGAAAGAGGTAAGTTAGGGTCA |
| Mouse <i>Ndufa8</i> FOR  | GGAGCTGCCAACTCTGGAAG    |
| Mouse <i>Ndufa8</i> REV  | CCAGCGGCACAGCATAAAC     |
| Mouse <i>Ndufb10</i> FOR | CTCCCTAACCCCATCACCTAC   |
| Mouse <i>Ndufb10</i> REV | TGGCACTCGACGGTACTGT     |
| Mouse <i>Opa1</i> FOR    | TGGAAAATGGTTCGAGAGTCAG  |
| Mouse <i>Opa1</i> REV    | CATTCCGTCTCTAGGTTAAAGCG |
| Mouse <i>Nd1</i> FOR     | CTCTTATCCACGCTTCCGTTACG |
| Mouse <i>Nd1</i> REV     | GATGGTGGTACTCCCGCTGTA   |
| Mouse <i>H19</i> FOR     | GTACCCACCTGTCGTCC       |
| Mouse <i>H19</i> REV     | GTCCACGAGACCAATGACTG    |

**Table S2. Antibodies used for Western blot analyses**

| <b>Antibody</b>      | <b>Company</b>            | <b>Catalog Number</b> | <b>Dilution</b> |
|----------------------|---------------------------|-----------------------|-----------------|
| AMPK alpha Rabbit    | Cell Signaling Technology | 5832S                 | 1:1000          |
| p-AMPK alpha Rabbit  | Cell Signaling Technology | 2535S                 | 1:1000          |
| ATF2/ATF7 Rabbit     | Cell Signaling Technology | 82870S                | 1:1000          |
| p- ATF2/ATF7 Rabbit  | Cell Signaling Technology | 24329S                | 1:1000          |
| p38 MAPK Rabbit      | Cell Signaling Technology | 8690S                 | 1:1000          |
| p-p38 MAPK Rabbit    | Cell Signaling Technology | 9215S                 | 1:1000          |
| CREB Rabbit          | Cell Signaling Technology | 9197S                 | 1:1000          |
| p- CREB Rabbit       | Cell Signaling Technology | 9198S                 | 1:1000          |
| mTOR Rabbit          | Cell Signaling Technology | 2972S                 | 1:1000          |
| p-mTOR Rabbit        | Cell Signaling Technology | 2974S                 | 1:1000          |
| DRP1 Rabbit          | Cell Signaling Technology | 8570S                 | 1:1000          |
| GAPDH Rabbit         | Cell Signaling Technology | 5174S                 | 1:8000          |
| $\beta$ actin Rabbit | Cell Signaling Technology | 8457S                 | 1:5000-1:30000  |
| Goat anti-Rabbit IgG | Jackson ImmunoResearch    | 111-035-144           | 1:4000          |
| Anti-PGC1a (Rabbit)  | Millipore                 | AB3242                | 1:1000          |
| Anti-KLOTHO (Rabbit) | Sigma Aldrich             | SAB3500604            | 3 $\mu$ g/ml    |
